# Supplementary material for: Tridimensional visualization reveals direct communication between the embryo and glands critical for implantation
Source: PubMed Central journal article supplement (PMC5807548; doi:10.1038/s41467-018-03092-4), 2018-02-09
Supplement: 41467_2018_3092_MOESM1_ESM.pdf [file 41467_2018_3092_MOESM1_ESM.pdf]

## **Tridimensional visualization reveals direct communication between the embryo and glands critical for implantation**

Jia et al.

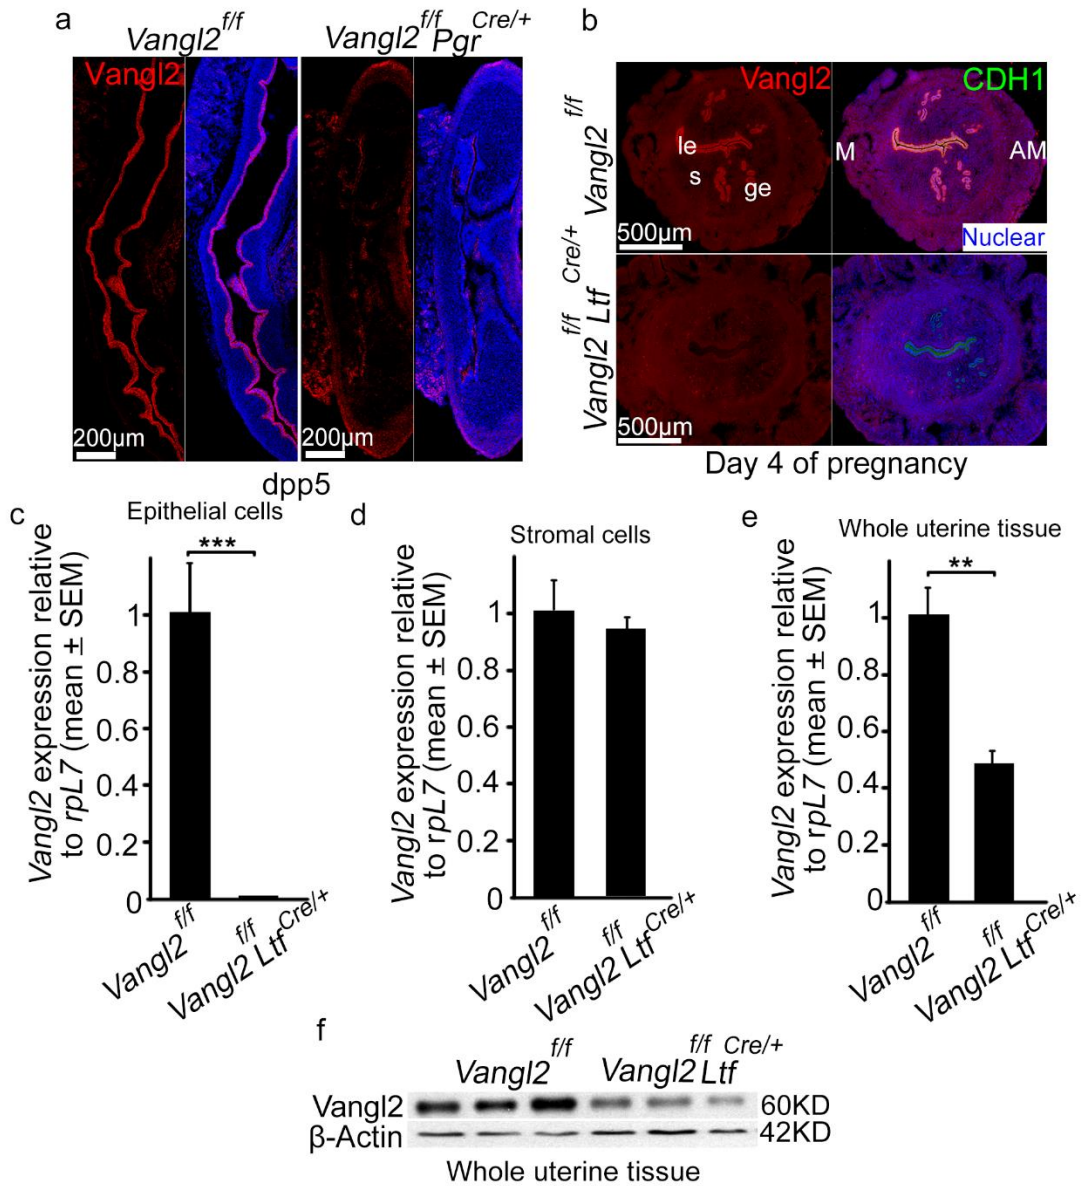

## Supplementary Figure. 1

**Supplementary Figure 1 | Efficiency of *Vangl2* deletion in *Vangl2*<sup>f/f</sup>*Ltf*<sup>Cre/+</sup> mice.** **a**, IF of *Vangl2* in dpp5 (postpartum day 5) uterus of *Vangl2*<sup>f/f</sup> and *Vangl2*<sup>f/f</sup>*Pgr*<sup>Cre/+</sup> mice (n = 3 independent experiments). Scale bar: 200 μm. **b**, IF of *Vangl2* and CDH1 in day 4 pregnant uteri of *Vangl2*<sup>f/f</sup> and *Vangl2*<sup>f/f</sup>*Ltf*<sup>Cre/+</sup> mice (n = 3 independent experiments). ge, glandular epithelium; le, luminal epithelium; s, stroma; M, mesometrial pole; AM, antimesometrial pole. Scale bar: 500 μm. **c**,

qRT-PCR of *Vangl2* in separated epithelial cells of *Vangl2<sup>ff</sup>* and *Vangl2<sup>ff</sup>Ltf<sup>Cre/+</sup>* mice on day 4 (Mean  $\pm$  s.e.m. is derived from the indicated number of samples and analyzed by Student's *t* test, \*\*\**p* < 0.001). **d**, qRT-PCR of *Vangl2* in day 4 separated stromal cells of *Vangl2<sup>ff</sup>* and *Vangl2<sup>ff</sup>Ltf<sup>Cre/+</sup>* mice (Mean  $\pm$  s.e.m. is derived from the indicated number of samples and analyzed by Student's *t* test). **e**, qRT-PCR of *Vangl2* in whole uteri of *Vangl2<sup>ff</sup>* and *Vangl2<sup>ff</sup>Ltf<sup>Cre/+</sup>* mice on day 4. (Mean  $\pm$  s.e.m. is derived from the indicated number of samples and analyzed by Student's *t* test, \*\**p* < 0.01). Data are shown as mean  $\pm$  SEM (n=4). **f**, Western blotting results of *Vangl2* in whole uterine tissues of *Vangl2<sup>ff</sup>* and *Vangl2<sup>ff</sup>Ltf<sup>Cre/+</sup>* mice (n=3).

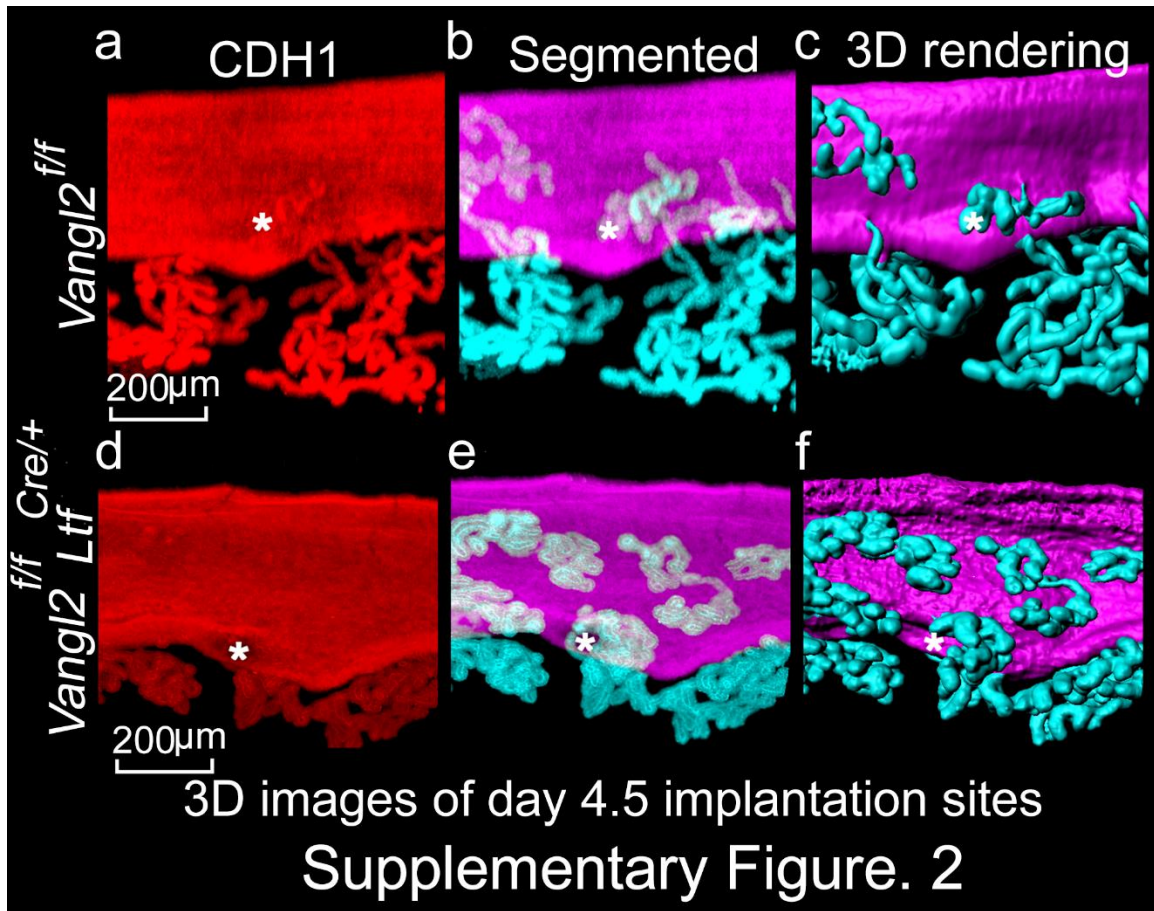

**Supplementary Figure 2 | 3D imaging of day 4.5 implantation sites in *Vangl2<sup>f/f</sup>* and *Vangl2<sup>f/f</sup>Ltf<sup>Cre/+</sup>* mice. a-f, Images of CDH1 immunostaining, segmented and 3D rendering in day 4.5 *Vangl2<sup>f/f</sup>* and *Vangl2<sup>f/f</sup>Ltf<sup>Cre/+</sup>* implantation sites (n = 3 independent experiments). Images are generated by Nikon A1R Multiphoton with LWD 16X water objective with 3 μm Z-stack. \*, location of embryos. Scale bar: 200 μm.**

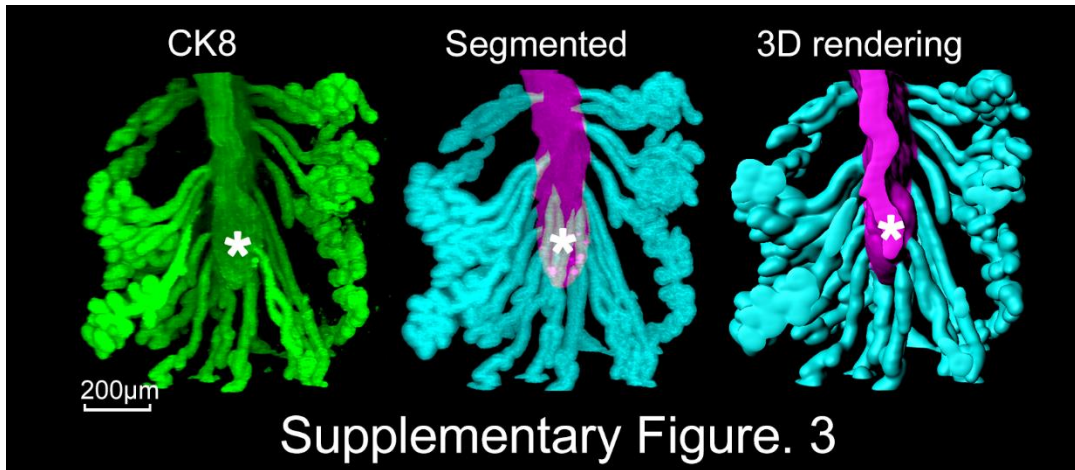

**Supplementary Figure 3 | 3D imaging of day 5 implantation sites in *Vangl2<sup>fl</sup>* mice staining with CK8 at sectional view.** Images of CK8 immunostaining, segmented and 3D rendering of a day 5 implantation site generated by two-photon microscopy (n = 3 independent experiments). \*: crypt containing the embryo. Scale bar: 200 μm.

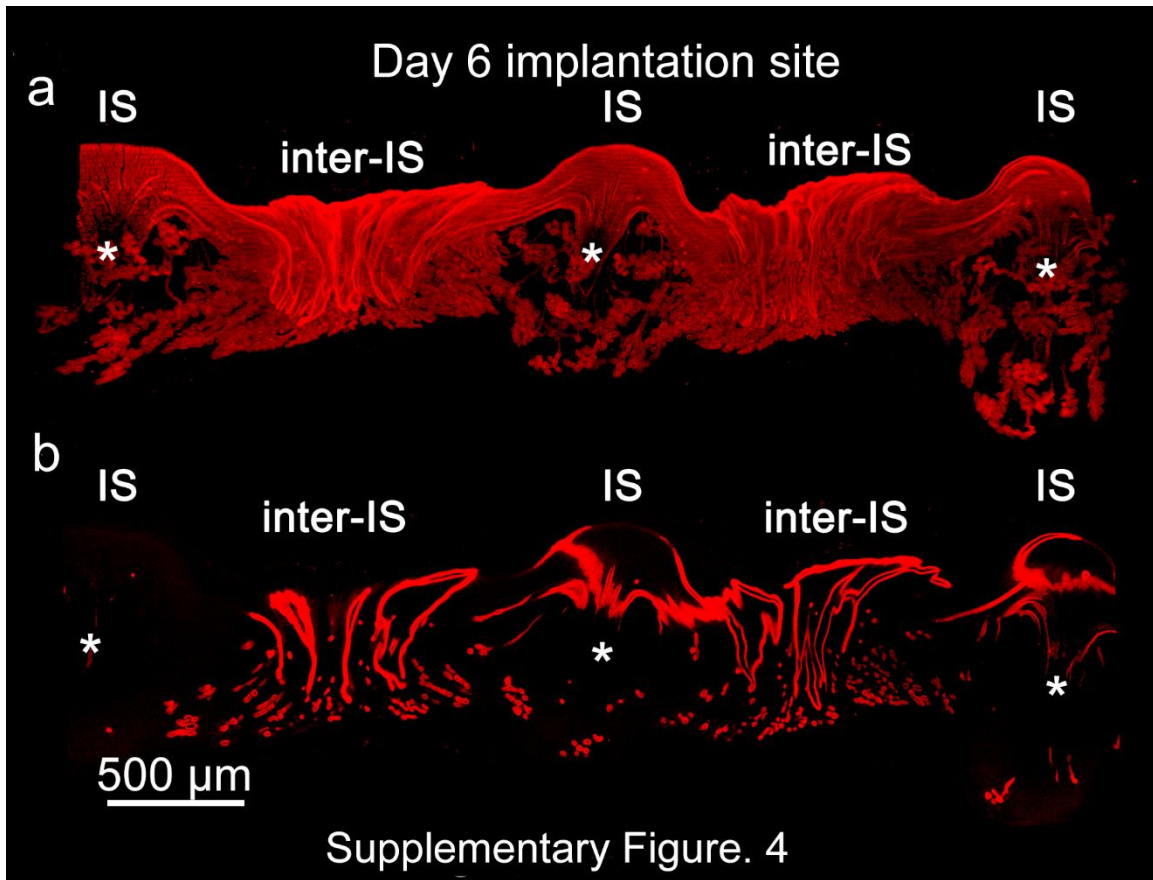

**Supplementary Figure 4 | Images of a day 6 uterus with implantation sites and inter-implantation sites stained with CDH1. a**, 3D image of D6 with three implantation sites and two inter-implantation sites (n = 3 independent experiments). Note glands at the inter-implantation sites are compressed, while glands at implantation sites are extended and developed. **b**, A sectional view of 3D image. IS, Implantation site; inter-IS, inter-implantation site. Images were generated by Nikon A1R Multiphoton Microscope; Plan Apo  $\lambda$  10X objective with 12  $\mu$ m Z-stack. \*, location of embryos. Scale bar: 500  $\mu$ m.

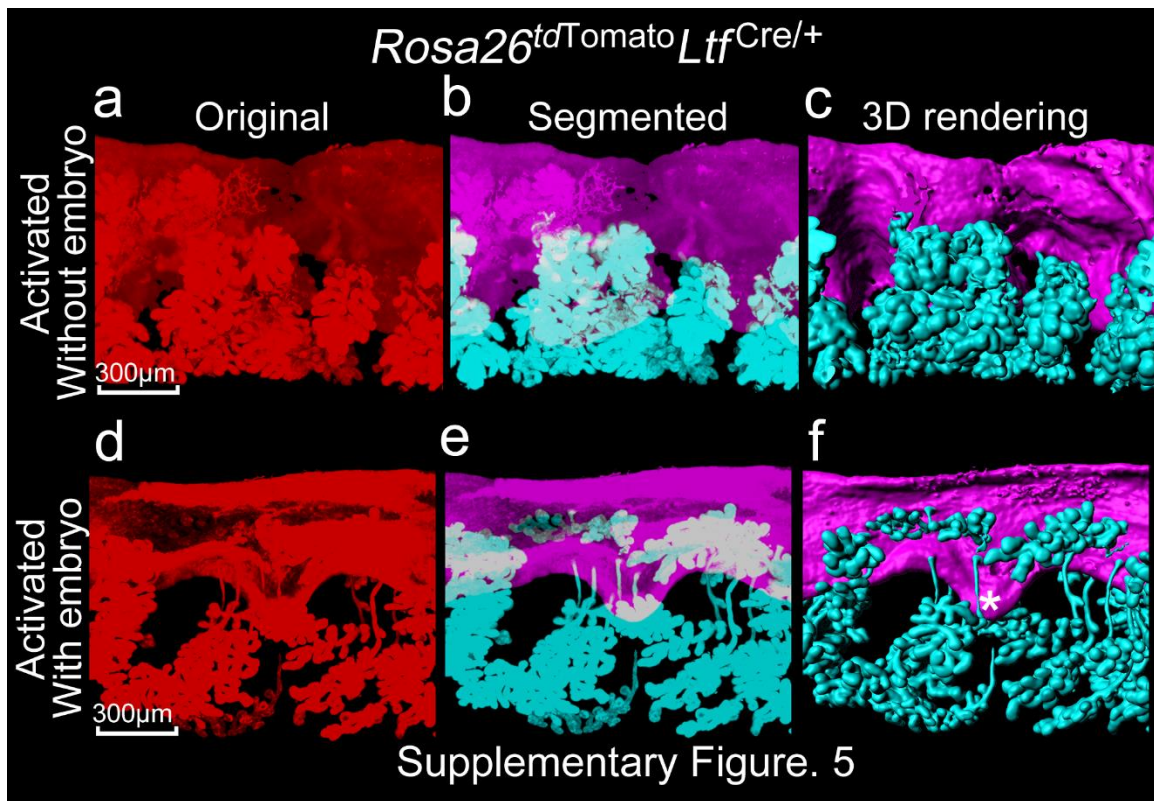

**Supplementary Figure 5 | Images of activated uterus with or without implantation sites in the same mouse. a-c,** shows 3D image of one uterine horn after termination of delay with estrogen in the absence of blastocysts in *Rosa26<sup>tdTomato</sup> Ltf<sup>Cre/+</sup>* reporter mouse (n = 3 independent experiments). **d-f,** Images after termination of delay with estrogen in the presence of blastocyst from the contralateral horn of the same reporter mouse (n = 3 independent experiments). (Images were generated by Nikon A1R Multiphoton Microscope; LWD 16X water objective with 3 µm Z-stack). \*location of embryos. Scale bar: 300 µm.

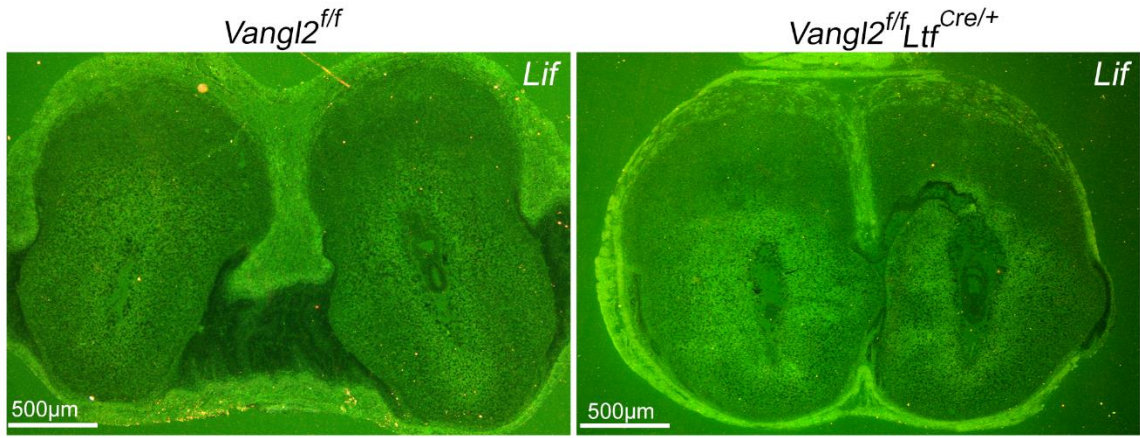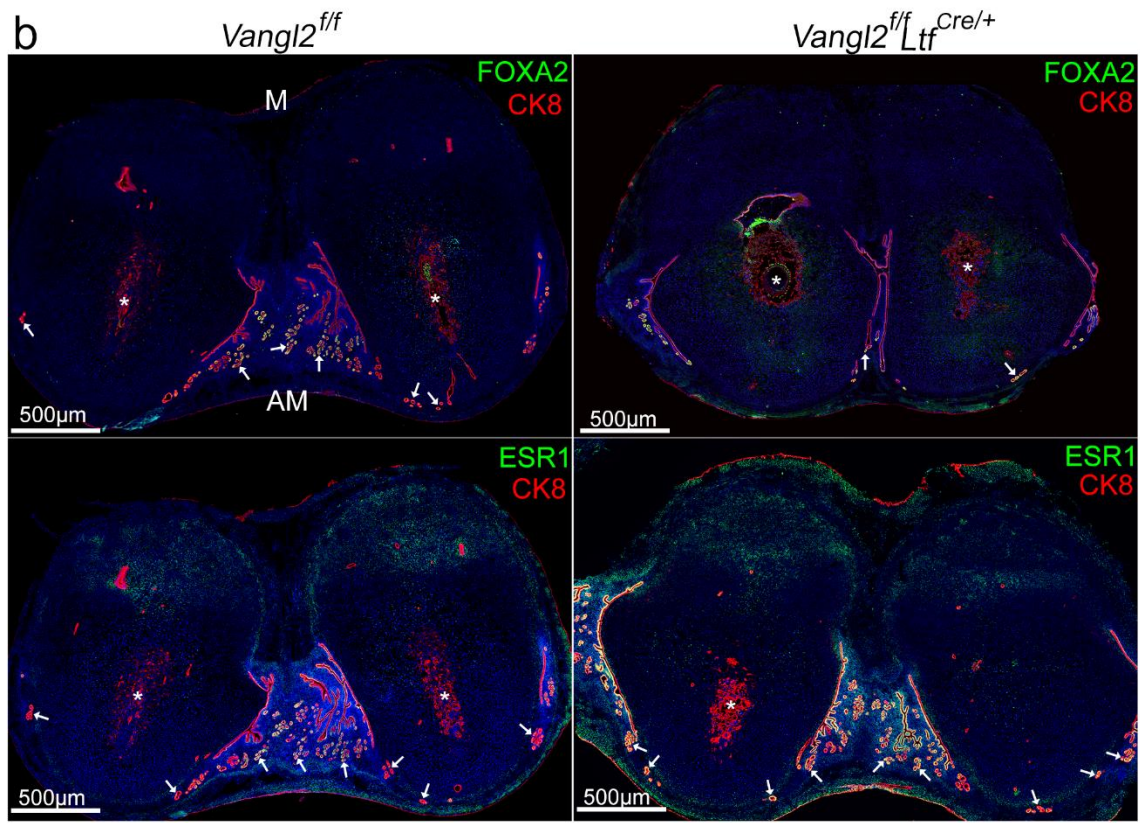

Day 8 of pregnancy

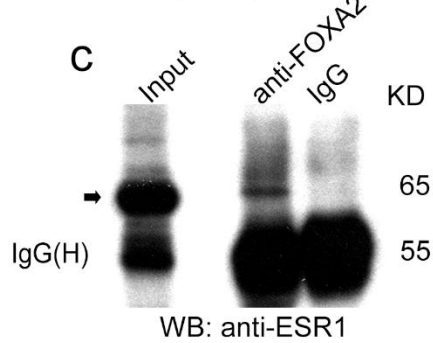

Supplementary Figure. 6



**Supplementary Figure 6 | a**, *In situ* hybridization of *Lif* in day 8 uteri of *Vangl2<sup>fl/fl</sup>* and *Vangl2<sup>fl/fl</sup>Lt<sup>Cre/+</sup>* mice (n = 3 independent experiments). Scale bar: 500  $\mu$ m. **b**, Co-staining of FOXA2 and CK8, ESR1 and CK8 in longitudinal sections of day 8 implantation sites in *Vangl2<sup>fl/fl</sup>* and *Vangl2<sup>fl/fl</sup>Lt<sup>Cre/+</sup>* mice (n = 3 independent experiments). Arrows indicate locations of glands. Asterisks indicate embryos. Scale bar: 500  $\mu$ m. **c**, Co-IP shows FOXA2 interacts with ESR1 (n = 3 independent experiments). Arrow indicates FOXA2 band. WB: Western blot.

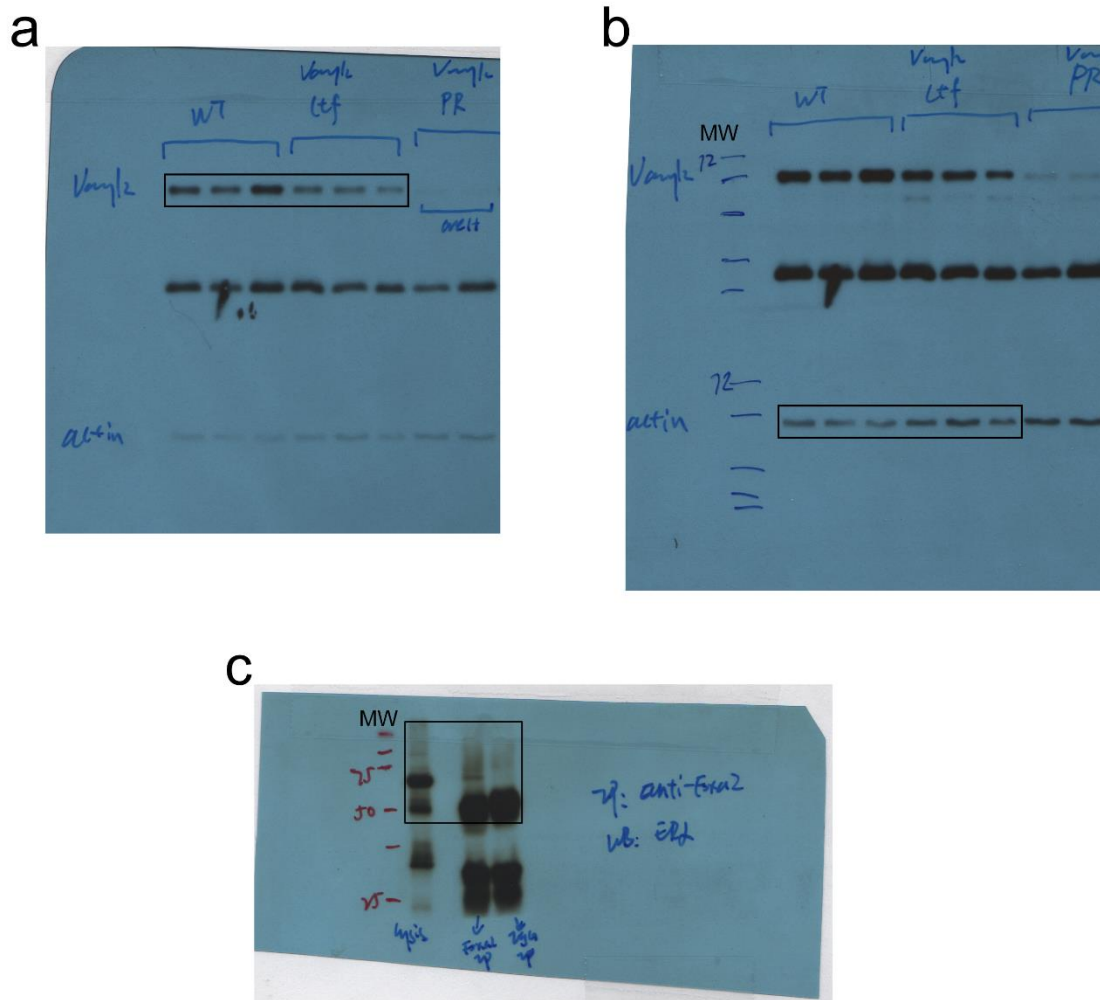

## Supplementary Figure 7

**Supplementary Figure 7** | Scans of the uncropped films for Western Blotting. **a** and **b** show the different exposure times for the same blot for Supplementary Figure 1f. **c**, depicts the uncropped scan of the film for Supplementary Figure 6c. MW, molecular weight.
